# Supplementary material for: An Efficient Technique to Reverse Engineer Minterm Protection Based Camouflaged Circuit
Source: Springer Nature journal article supplement (doi:10.1007/s11390-018-1870-z), 2018-09-01
Supplement: 11390_2018_1870_MOESM1_ESM.pdf [file 11390_2018_1870_MOESM1_ESM.pdf]

# **An Efficient Technique to Reverse Engineer Minterm Protection based Camouflaged Circuit**

Shan Jiang, Ning Xu, XueYan Wang, Qiang Zhou

Jiang S, Xu N, Wang XY et al. An efficient technique to reverse engineer minterm protection based camouflaged circuit. JOURNAL OF COMPUTER SCIENCE AND TECHNOLOGY 33(5): 998-1006 Sept. 2018. DOI 10.1007/s11390-018-1870-z

# 1

## Research Problem

- Background

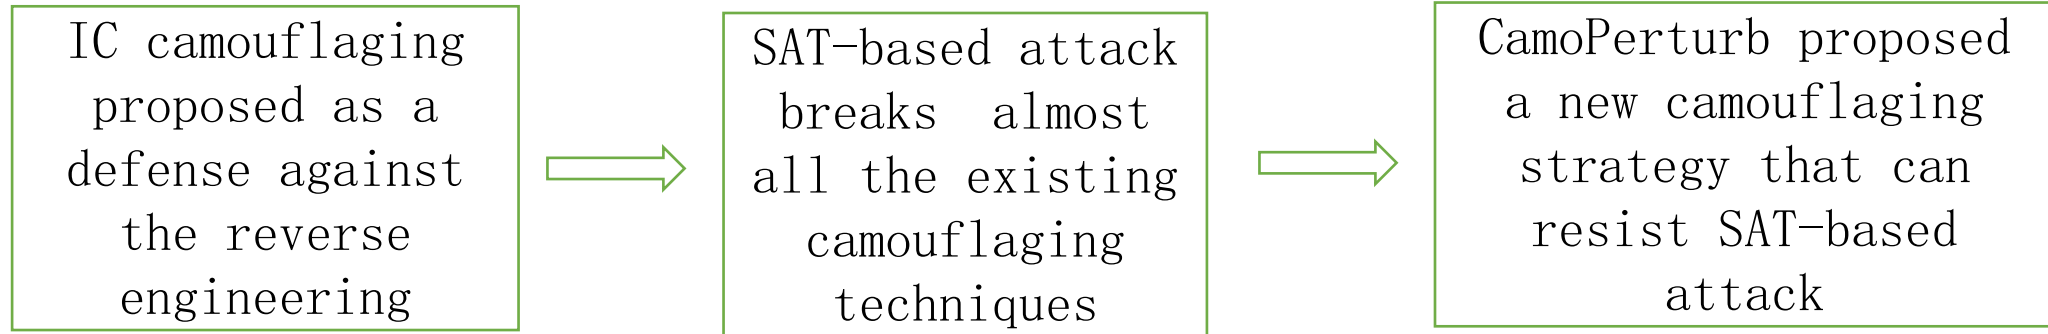

- Purpose

- ✓ Evaluate the security of this minterm protection based camouflaging strategy to enhance its resistance against reverse engineering.

1. Demonstrate the mechanism of influence relation between gate functionality and minterm perturbation in a circuit.
2. Propose a novel attack algorithm to reverse engineer the CamoPerturb circuit.
3. Evaluate the security of minterm protection based IC camouflaging strategy and give some suggestions for improvement.

---

**Algorithm 1:** Decamouflage CamoPerturb
 

---

**Input:** Camouflaged netlist, Functional IC

**Output:** perturbed minterm, changed gate

```

1 Remove CamoFix block;
2 foreach gate  $G$  in  $C_{pert}$  do
3   Calculate the  $SMA\{G\}$ ;
4   if  $|SMA(I)| = 1$  then
5     Record the minterm and gate in PerturbedList
6   end
7 end
8 foreach minterm in  $PerturbedList$  do
9   if the output of Camouflaged netlist and Functional IC
    is different then
10    Restore gate functionality, Resolve functionality,
    Break;
11  end
12 end

```

---

- Results
  - ✓ The proposed attack method is able to restore the camouflaged circuits with very little time consumption.
  - ✓ This minterm protection based camouflaging strategy still has some security vulnerabilities and should be improved.
- Future work
  - Synthesizing the perturbed circuit and camouflaged circuit to defend against removing attack.
  - Enhance the security of the remaining minterm perturbed block.
